# Supplementary material for: Peripheral blood CD4+CCR6+ compartment differentiates HIV-1 infected or seropositive elite controllers from long-term successfully treated individuals
Source: PubMed Central journal article supplement (PMC9008025; doi:10.1038/s42003-022-03315-x), 2022-04-13
Supplement: 42003_2022_3315_MOESM2_ESM.pdf [file 42003_2022_3315_MOESM2_ESM.pdf]

## Supplementary Information

### Peripheral blood CD4<sup>+</sup>CCR6<sup>+</sup> compartment differentiates HIV-1 infected or seropositive elite controllers from long-term successfully treated individuals

Sara Svensson Akusjärvi<sup>1,\*</sup>, Shuba Krishnan<sup>1</sup>, Bianca B. Jütte<sup>2</sup>, Anoop T. Ambikan<sup>1</sup>, Soham Gupta<sup>1</sup>, Jimmy Esneider Rodriguez<sup>3</sup>, Ákos Végvári<sup>3</sup>, Maïke Sperk<sup>1</sup>, Piotr Nowak<sup>4</sup>, Jan Vesterbacka<sup>4</sup>, J. Peter Svensson<sup>2</sup>, Anders Sönnnerborg<sup>1,4</sup>, and Ujjwal Neogi<sup>1,5,6,\*</sup>

#### Affiliations

<sup>1</sup> Division of Clinical Microbiology, Department of Laboratory Medicine, Karolinska Institutet, ANA Futura, Campus Flemingsberg, 141 52 Stockholm, Sweden

<sup>2</sup> Department of Biosciences and Nutrition, Karolinska Institutet, Neo, Campus Flemingsberg, 141 83 Stockholm, Sweden

<sup>3</sup> Division of Chemistry I, Department of Medical Biochemistry and Biophysics, Karolinska Institutet, Campus Solna, 171 65 Stockholm, Sweden

<sup>4</sup> Division of Infectious Disease, Department of Medicine Huddinge, Karolinska Institutet, I73, Karolinska University Hospital, 141 86 Stockholm, Sweden

<sup>5</sup> Christopher S. Bond Life Sciences Centre, University of Missouri, Columbia, MO, 65211, USA

<sup>6</sup> Manipal Institute of Virology (MIV), Manipal Academy of Higher Education, Manipal, Karnataka, India

**Supplementary Table 1: Treatment regimen**

| <b>Treatment regimen, N (%)</b> | <b>ART</b> |
|---------------------------------|------------|
| 3TC/DTG                         | 1 (1.8)    |
| ABC/3TC/DRV/ritonavir           | 3 (5.5)    |
| ABC/3TC/DTG                     | 20 (37)    |
| ABC/3TC/EFV                     | 5 (9.3)    |
| ABC/3TC/NVP                     | 2 (3.7)    |
| ABC/3TC/RPV                     | 4 (7.4)    |
| CAB/RPV*                        | 1 (1.8)    |
| DRV/COB/DTG                     | 1 (1.8)    |
| RAL/3TC/EFV                     | 1 (1.8)    |
| TAF/FTC/DTG                     | 5 (9.3)    |
| TAF/FTC/EFV                     | 1 (1.8)    |
| TDF/FTC/DTG                     | 2 (3.7)    |
| TDF/FTC/EFV                     | 3 (5.5)    |
| TDF/TFC/EVG/Cob                 | 1 (1.8)    |
| TDF/FTC/RPV                     | 4 (7.4)    |

*3TC, Lamivudine; ABC, Abacavir; \*CAB/RPV, Cabotegravir given together with rilpivirine intramuscularly as long-acting drugs; COB, Cobicistat; DRV, Darunavir; r, ritonavir (boosterdose); DTG, Dolutegravir; EFV, Efavirenz; EVG, Elvitegravir; FTC, Emtricitabine; N, Number; NVP, Nevirapine; RAL, Raltegravir; RPV, Rilpivirine; TDF, Tenofovir Disoproxil; TAF, Tenofovir Alafenamide*

**Supplementary Table 2:** Patient characteristics of the longitudinal data

| Parameter                                     | T1                     | T2                      | P-values            |
|-----------------------------------------------|------------------------|-------------------------|---------------------|
| <i>N</i>                                      | 10                     | 10                      | NA                  |
| Gender, Female, <i>N</i> (%)                  | 2 (20)                 | 2 (20)                  | NA                  |
| <b>At sampling</b>                            |                        |                         |                     |
| Age in years, mean (SD)                       | 52 (7.93)              | 55 (7.93)               | 0.4087 <sup>#</sup> |
| CD4 count (cells/ $\mu$ L); median (IQR)      | 510 (460-557.5)        | 510 (370-700)           | 0.9847*             |
| CD8 count (cells/ $\mu$ L); median (IQR)      | 500 (425-640)          | 430 (345-655)           | 0.7039*             |
| CD4:CD8 ratio; median (IQR)                   | 1.084<br>(0.7811-1.31) | 1.214<br>(0.8712-1.479) | 0.5490*             |
| Years on treatment; median (IQR)              | 19 (16.75-23.25)       | 22 (19.75-26.25)        | 0.1152*             |
| Viral Load; Log <sub>10</sub> copies/mL (IQR) | 0 (0-0)                | 0 (0-0)                 | 0.4737*             |

*IQR*, Interquartile Range; *N*, Number; *NA*, Not Applicable; *SD*, Standard Deviation; \*Mann-Whitney U-test; <sup>#</sup>Unpaired t-test

**Supplementary Table 3:** Primers and probes used for quantification of HIV-1 DNA

| <b>Total HIV DNA quantification</b> |                                                      |
|-------------------------------------|------------------------------------------------------|
| Beta globin probe                   | HEX-ATCCACGTTACCTTGCCCCACA-TAM                       |
| Beta globin forward                 | AGGGCCTCACCACCAACTT                                  |
| Beta globin reverse                 | GCACCTGACTCCTGAGGAGAA                                |
| HIV (HXB2) probe                    | FAM-AAGTAGTGTGTGCCCGTCTG-MGBEQ                       |
| HIV (HXB2) forward                  | GCCTCAATAAAGCTTGCCTTGA                               |
| HIV (HXB2) reverse                  | GGCGCCACTGCTAGAGATTTT                                |
| <b>FAM coupled probes + primers</b> |                                                      |
| RPP30 3' (ctrl) probe               | /56-FAM/AGAGAGCAA/ZEN/CTTCTTCAAGGGCCCC/3IABkFQ/      |
| RPP30 3' forward                    | GTGTGAGTCAATCACTAGACAGAA                             |
| RPP30 3' reverse                    | AAACTGCAACAACATCATAGAGC                              |
| 2-LTRcircle probe                   | /56-FAM/ACACTACTT/ZEN/GAAGCACTCAAGGCAAGCTTT/3IABkFQ/ |
| 2-LTRcircle forward                 | AACTAGGGAACCCACTGCTTAAG                              |
| 2-LTRcircle reverse                 | TCCACAGATCAAGGATATCTTGTC                             |
| Pol probe                           | /56-FAM/AAGCCAGGA/ZEN/ATGGATGGCC/3IABkFQ/            |
| Pol forward                         | GCACTTTAAATTTCCCATTAGTCCTA                           |
| Pol reverse                         | CAAATTTCTACTAATGCTTTTATTTTTTC                        |
| Psi ( $\Psi$ ) probe                | /56-FAM/TTTTGGCGT/ZEN/ACTCACCAGT/3IABkFQ/            |
| Psi ( $\Psi$ ) forward              | CAGGACTCGGCTTGCTGAAG                                 |
| Psi ( $\Psi$ ) reverse              | GCACCCATCTCTCTCCTTCTAGC                              |
| <b>HEX coupled probes + primers</b> |                                                      |
| RPP30 (ctrl) probe                  | /5HEX/CTGACCTGA/ZEN/AGGCTCT/3IABkFQ/                 |
| RPP30 forward                       | GATTTGGACCTGCGAGCG                                   |
| RPP30 reverse                       | GCGGCTGTCTCCACAAGT                                   |
| 5'LTR probe                         | /5HEX/AAGTAGTGT/ZEN/GTGCCCGTCTG/3IABkFQ/             |
| 5'LTR forward                       | GCCTCAATAAAGCTTGCCTTGA                               |
| 5'LTR reverse                       | GGCGCCACTGCTAGAGATTTT                                |
| Env7781 probe                       | /5HEX/CCTTGGGTT/ZEN/CTTGGGA/3IABkFQ/                 |
| Env7781 forward                     | AGTGGTGCAGAGAGAAAAAAGAGC                             |
| Env7781 reverse                     | GTCTGGCCTGTACCGTCAGC                                 |
| <b>Uncoupled probes</b>             |                                                      |
| Env 7781 hypermutation probe        | CCTTAGGTTCTTAGGAGC/3IABkFQ/                          |

**Supplementary Table 4:** TMT11plex labelling distribution for CCR6<sup>+</sup> and CCR6<sup>-</sup> samples

| B1      |      | B2      |      | B3      |      |
|---------|------|---------|------|---------|------|
| ART01 + | 126  | ART03 + | 127N | ART05 + | 131N |
| ART01 - | 127N | ART03 - | 128C | ART05 - | 130N |
| ART02 + | 127C | ART04 + | 129N | ART06 + | 129N |
| ART02 - | 128N | ART04 - | 130C | ART06 - | 128N |
| EC01 +  | 128C | EC03 +  | 131N | EC05 +  | 127N |
| EC01 -  | 129N | EC03 -  | 130N | EC05 -  | 126  |
| EC02 +  | 129C | EC04 +  | 129C | EC06 +  | 130C |
| EC02 -  | 130N | EC04 -  | 128N | EC06 -  | 127C |
| HC02 +  | 130C | HC01 +  | 127C | HC03 +  | 128C |
| HC02 -  | 131N | HC01 -  | 126  | HC03 -  | 129C |
| Norm    | 131C | Norm    | 131C | Norm    | 131C |

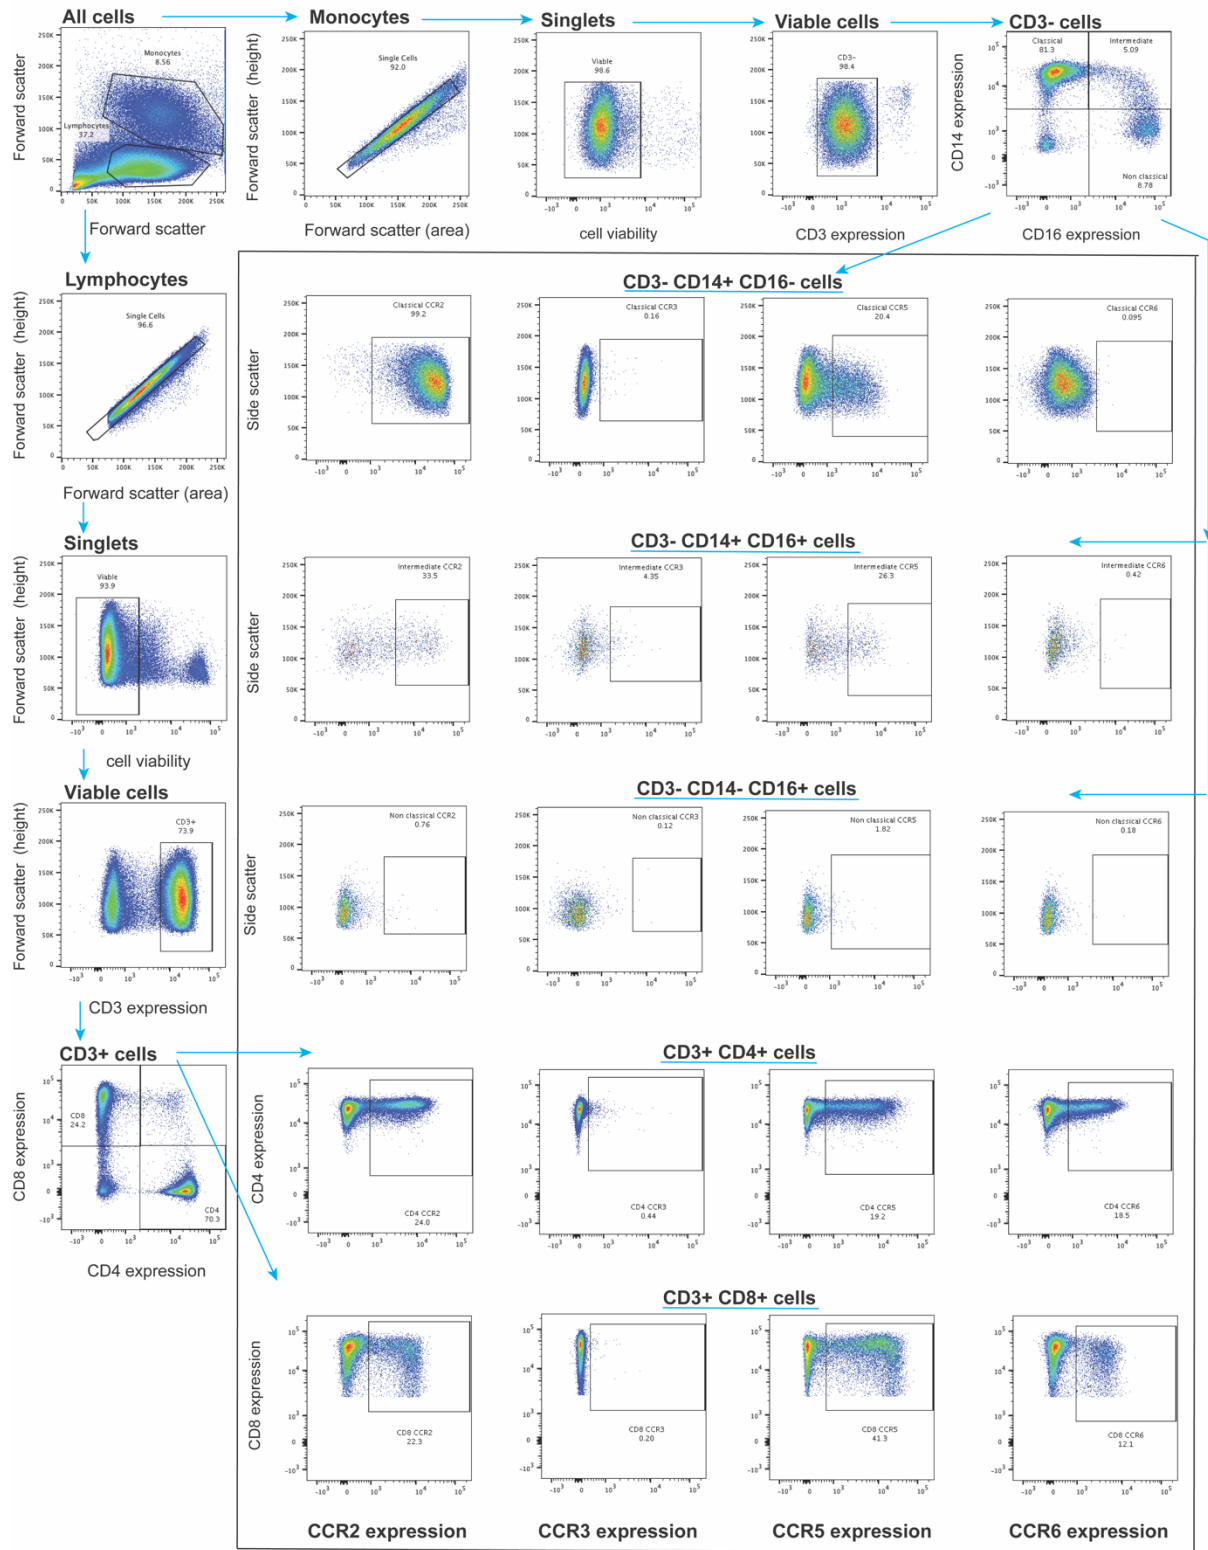

**Supplementary Fig. 1: Gating strategy for CCR2, CCR3, CCR5, and CCR6 flow cytometry detection**

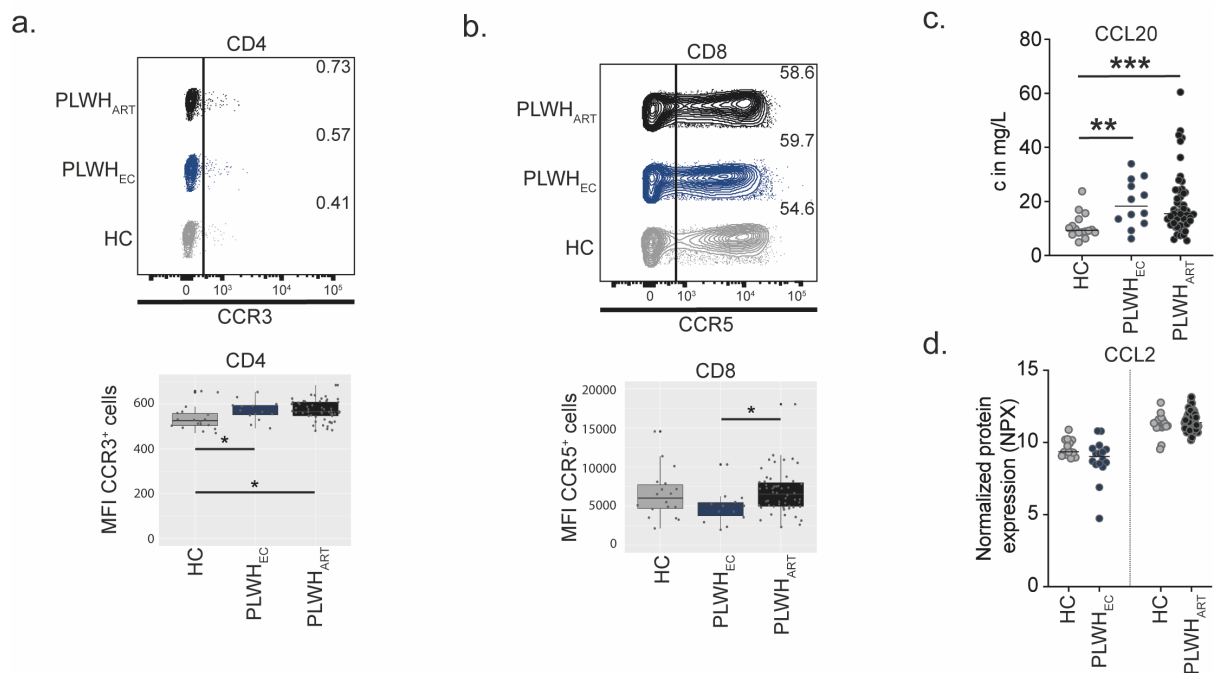

**Supplementary Fig. 2: Chemokine receptor expression on lymphocytic cell populations.**

Flow cytometry detection in lymphocytic cell populations in PLWH<sub>EC</sub> ( $n=14$ ), PLWH<sub>ART</sub> ( $n=54$ ), and HC ( $n=18$ ). **a** Expression of CCR3 in CD4<sup>+</sup> T cells. The contour plot is a median representative sample of % of cells expressing CCR3, and the boxplot shows the median fluorescence intensity (MFI). **b** Expression of CCR5 in CD8<sup>+</sup> T cells. The contour plot is a median representative sample of % of cells expressing CCR5, and the boxplot shows the median MFI. **c** Chemokine detection of CCL20 in plasma of PLWH<sub>EC</sub> ( $n=12$ ), PLWH<sub>ART</sub> ( $n=49$ ), and HC ( $n=16$ ). **d** Normalized expression profile of CCL2 plasma levels in PLWH<sub>EC</sub> ( $n=14$ ), PLWH<sub>ART</sub> ( $n=51$ ), and HC ( $n=17$ ). Chemokine detection by ELISA was performed in technical duplicates. Statistical significance was determined using two-tailed Mann-Whitney U-test (significance level  $p < 0.05$ , with  $* < 0.05$ ,  $** < 0.001$ ) and represented with median and 95% CI.

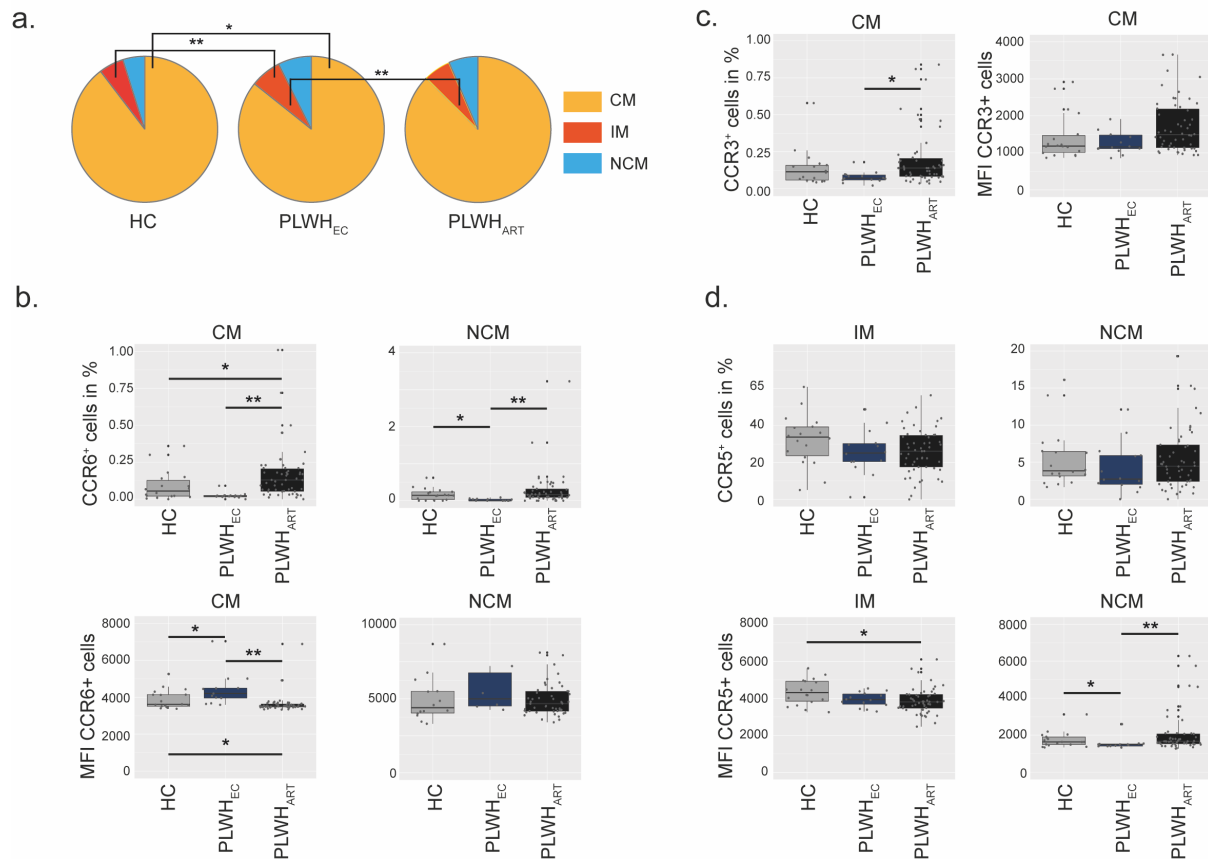

**Supplementary Fig. 3: Chemokine receptor expression on monocytic cell population.**

Flow cytometry detection in monocytic cell populations (classical monocytes (CM); CD14<sup>+</sup>CD16<sup>-</sup>, intermediate monocytes (IM); CD14<sup>+</sup>CD16<sup>+</sup>, and non-classical monocytes (NCM); CD14<sup>-</sup>CD16<sup>+</sup>) in PLWH<sub>EC</sub> ( $n=14$ ), PLWH<sub>ART</sub> ( $n=54$ ), and HC ( $n=18$ ). **a** Frequency distribution of CM, IM, and NCM. **b** Expression of CCR6 in CM and NCM cells. The upper row shows % of cells expressing the receptor and the bottom row shows the median fluorescence intensity (MFI). **c** Expression of CCR3 in CM. The left boxplot shows % of cells expressing the receptor and the right boxplot shows the MFI. **d** Expression of CCR5 in IM and NCM. The upper row shows % of cells expressing the receptor and the bottom row shows the MFI. Statistical significance was determined using two-tailed Mann-Whitney U-test (significance level  $p < 0.05$ , with \*  $< 0.05$ , \*\*  $< 0.001$ ) and represented as pie charts or with median using 95% CI.



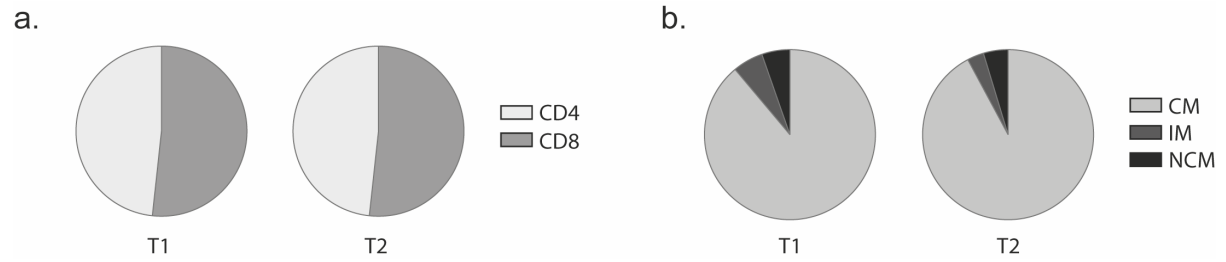

**Supplementary Fig. 4: Frequency of cell populations in longitudinal data of PLWH<sub>ART</sub>.**

Flow cytometry analysis of longitudinal dataset of HIV-1 infected individuals (timepoint 1 (T1),  $n=10$  and timepoint 2 (T2),  $n=10$ ). **a, b** Frequency of lymphocytic cell populations ( $CD4^+$  and  $CD8^+$ ) (**a**) and monocyte cell populations (classical monocytes (CM);  $CD14^+CD16^-$ , intermediate monocytes (IM);  $CD14^+CD16^+$ , and non-classical monocytes (NCM);  $CD14^-CD16^+$ ) (**b**) in T1 and T2.

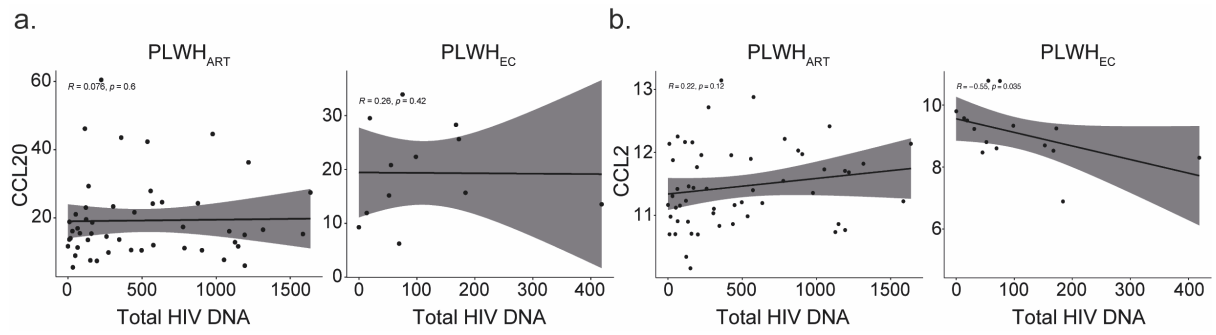

**Supplementary Fig. 5: Correlation of chemokines CCL20 and CCL2 to total HIV-1 DNA.**

**a, b** Correlation between total HIV-1 DNA and plasma levels of CCL20 (**a**) and CCL2 (**b**) in PLWH<sub>ART</sub> and PLWH<sub>EC</sub>. Statistical significance was tested using Spearman's correlation.

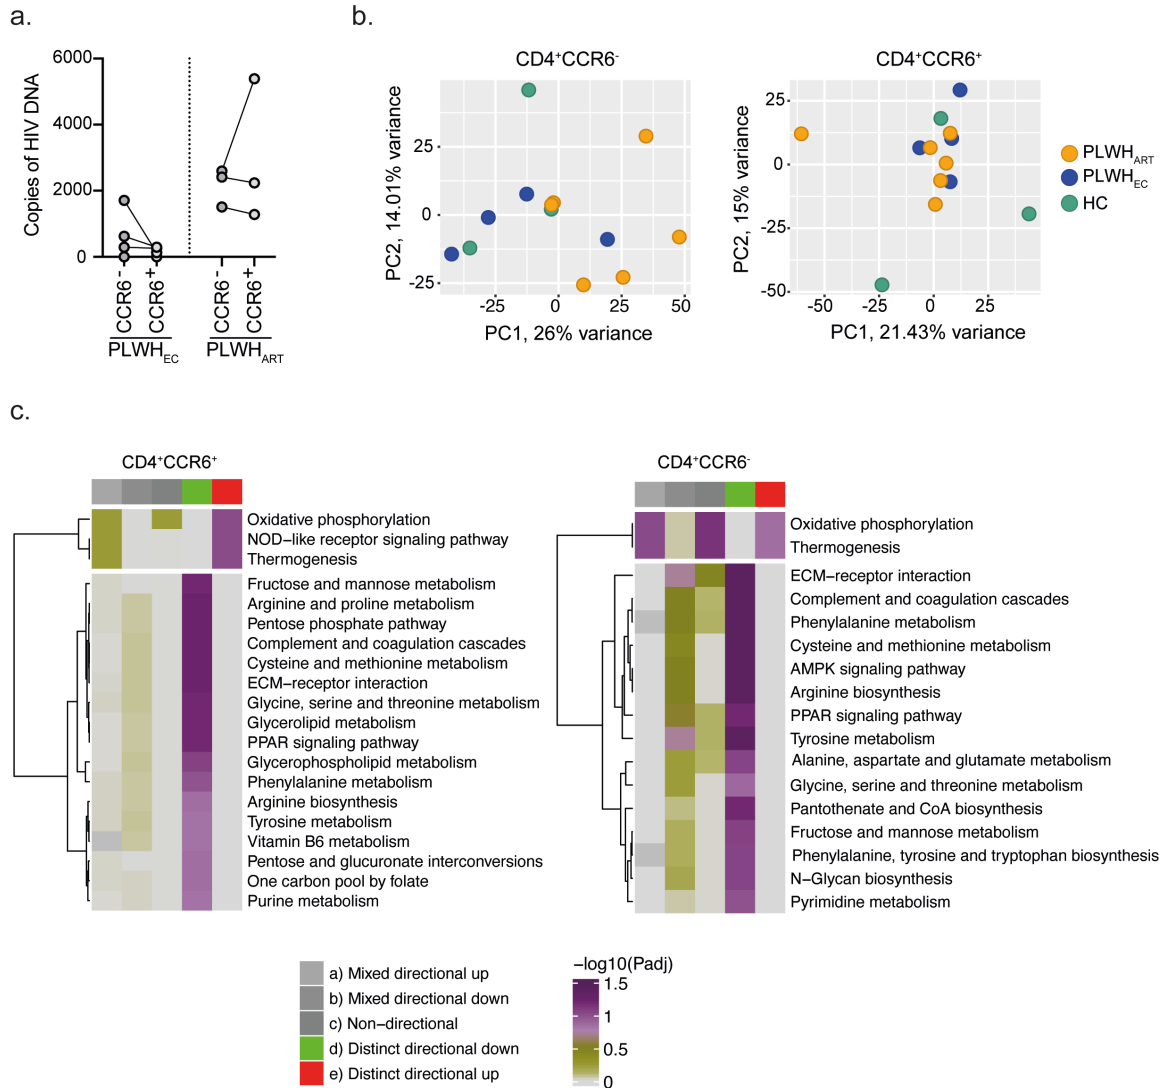

**Supplementary Fig. 6: Analysis of CD4<sup>+</sup>CCR6<sup>+</sup> and CD4<sup>+</sup>CCR6<sup>-</sup> cell populations in PLWH<sub>EC</sub> compared to PLWH<sub>ART</sub>.**

**a** HIV-1 DNA quantified in CD4<sup>+</sup>CCR6<sup>+</sup> and CD4<sup>+</sup>CCR6<sup>-</sup> cells from PLWH<sub>EC</sub> ( $n=5$ ) and PLWH<sub>ART</sub> ( $n=3$ ). Data is represented as paired datapoints where line is drawn within between the two populations in the same patient. The quantification was performed in technical duplicates. **b** Two-dimensional visualization of PC1 and PC2 of principal components analysis using CD4<sup>+</sup>CCR6<sup>-</sup> and CD4<sup>+</sup>CCR6<sup>+</sup> samples. **c** Heatmap representation of significant pathways found differentially regulated in CD4<sup>+</sup>CCR6<sup>+</sup> PLWH<sub>EC</sub> compared to CD4<sup>+</sup>CCR6<sup>+</sup> PLWH<sub>ART</sub> and in CD4<sup>+</sup>CCR6<sup>-</sup> PLWH<sub>EC</sub> compared to CD4<sup>+</sup>CCR6<sup>-</sup> PLWH<sub>ART</sub> using KEGG 2021. Color gradient is corresponding to the negative log scaled adjusted p-values. Each column represents p-values of various directionality classes, calculated for the pathways. Non-directional p-values are calculated based on gene-level statistics regardless of the direction of expression. Mixed directional up and mixed directional down p-values are calculated using the subset of the gene statistics that are up-regulated and down-regulated, respectively. Distinct directional up and distinct directional down p-values are calculated from gene statistics with expression direction.

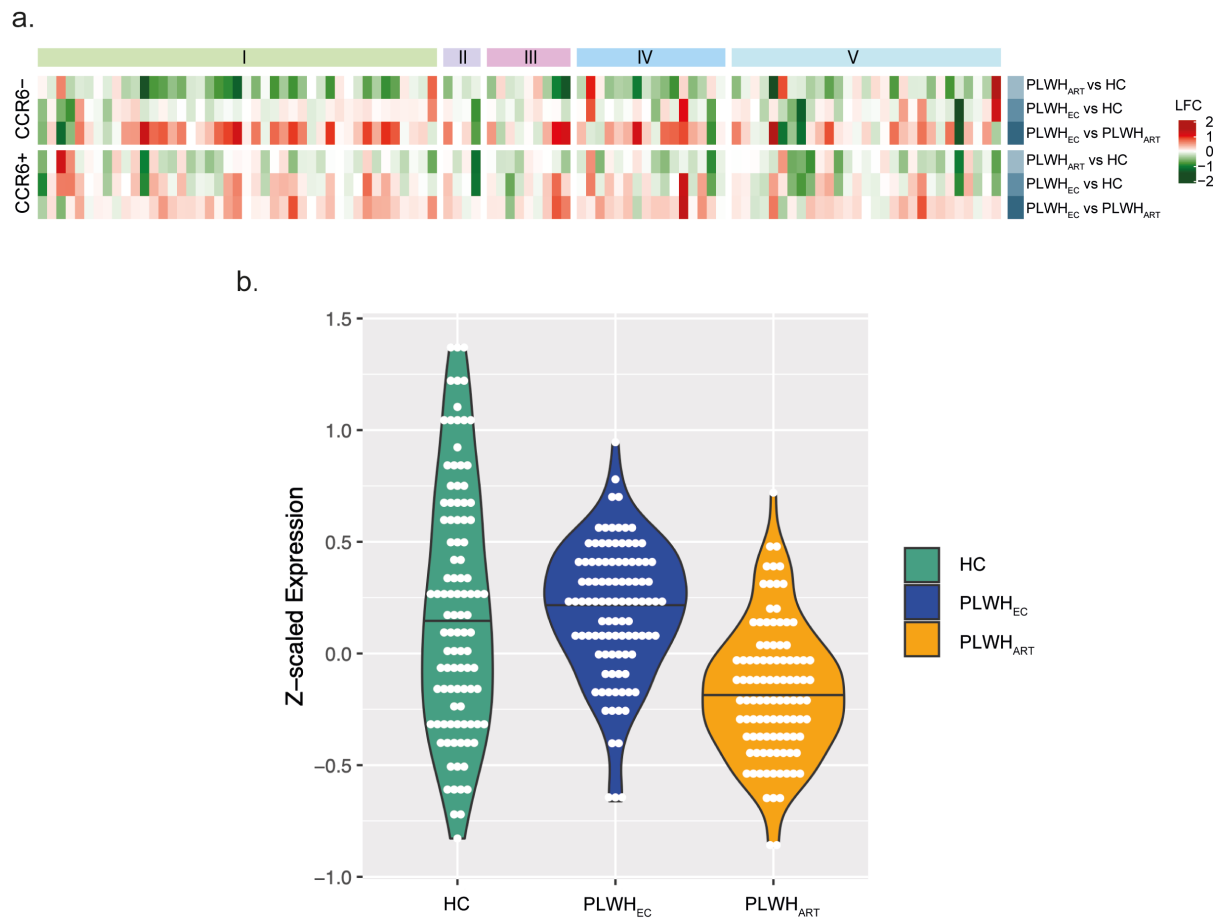

**Supplementary Fig. 7: Abundance of OXPPOS proteins detected from the proteomics analysis of CD4<sup>+</sup>CCR6<sup>+</sup> and CD4<sup>+</sup>CCR6<sup>-</sup> cells.**

**a** Heatmap visualization of regulation of OXPPOS pathway proteins detected in the proteomics experiment. Color gradient represents log<sub>2</sub> scaled fold change values. Column annotation denotes each of the five complexes of OXPPOS pathway. Row annotation denotes each of the pair-wise analysis performed. **b** Cumulative Z-scale expression of the OXPPOS genes.
