# Supplementary material for: Peripheral blood CD4+CCR6+ compartment differentiates HIV-1 infected or seropositive elite controllers from long-term successfully treated individuals
Source: PubMed Central journal article supplement (PMC9008025; doi:10.1038/s42003-022-03315-x), 2022-04-13
Supplement: 42003_2022_3315_MOESM3_ESM.pdf [file 42003_2022_3315_MOESM3_ESM.pdf]

## Description of Additional Supplementary Files

**File name:** Supplementary Data 1

**Description:** The source data underlying most graphs used in this manuscript.
